# Supplementary material for: Prognostic Significance of SATB1, SMAD3, Ezrin and β-Catenin in Patients with Pancreatic Adenocarcinoma
Source: MDPI journal article supplement (doi:10.3390/app12010306), 2021-12-29
Supplement: s1 [file s1]

## Supplementary Files

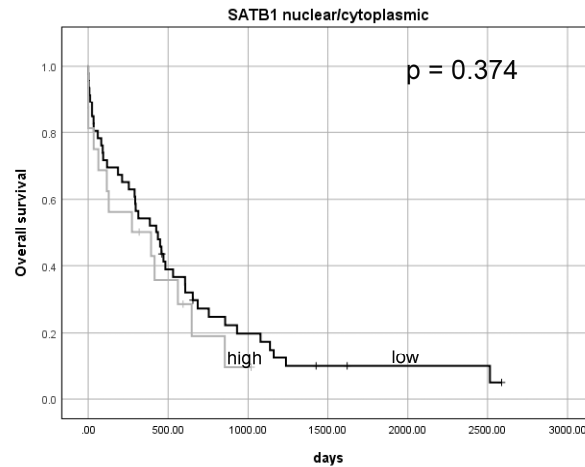

Figure S1. Kaplan-Meier curve for overall survival in patients pancreatic ductal adenocarcinomas by nuclear/cytoplasmic SATB1 protein expression. P value was calculated using the log-rank test.

Table S1. Univariate analysis of prognostic factors by Cox proportional hazard model in own cohort for cytoplasmic  $\beta$ -catenin protein expression.

| Variable                             | Univariate analysis of own cohort |        |       |         |
|--------------------------------------|-----------------------------------|--------|-------|---------|
|                                      | HR                                | 95% CI |       | P value |
|                                      |                                   | lower  | upper |         |
| SATB1 <sup>nuclear/cytoplasmic</sup> | 1.33                              | 0.71   | 2.52  | 0.38    |

Abbreviations: CI, confidence interval; HR, hazard ratio

Table S2. Multivariate analysis of prognostic factors by Cox proportional hazard model in own cohort for cytoplasmic  $\beta$ -catenin protein expression.

| Variable                             | Multivariate analysis of own cohort |        |       |              |
|--------------------------------------|-------------------------------------|--------|-------|--------------|
|                                      | HR                                  | 95% CI |       | P value      |
|                                      |                                     | lower  | upper |              |
| SATB1 <sup>nuclear/cytoplasmic</sup> | 1.38                                | 0.66   | 2.85  | 0.4          |
| age                                  | 1.05                                | 1.01   | 1.09  | <b>0.026</b> |
| TNM stage                            | 2.51                                | 1.24   | 5.05  | <b>0.01</b>  |
| LVI                                  | 2.67                                | 1.37   | 5.21  | <b>0.004</b> |

Significant p-values ( $p < 0.05$ ) are marked in bold. Abbreviations: CI, confidence interval; HR, hazard ratio; LVI—vascular invasion. HR: adjusting for age, TNM stage, VI.

Table S3. Parameters of network determined using the network analyzer Cytoscape plugin.

| GENE  | AVERAGE SHORTEST PATH LENGTH | BETWEENNESS CENTRALITY | CLOSENESS CENTRALITY | CLUSTERING COEFFICIENT | DEGREE | RADIALITY | STRESS  |
|-------|------------------------------|------------------------|----------------------|------------------------|--------|-----------|---------|
| APC   | 1.509                        | 0.018                  | 0.663                | 0.545                  | 26.000 | 0.990     | 310.000 |
| TBL1X | 1.792                        | 0.001                  | 0.558                | 0.742                  | 12.000 | 0.985     | 34.000  |

|          |       |       |       |       |        |       |          |
|----------|-------|-------|-------|-------|--------|-------|----------|
| SKP1     | 1.736 | 0.003 | 0.576 | 0.670 | 14.000 | 0.986 | 64.000   |
| BCL9     | 1.774 | 0.002 | 0.564 | 0.769 | 13.000 | 0.985 | 36.000   |
| JUN      | 1.396 | 0.015 | 0.716 | 0.605 | 32.000 | 0.992 | 404.000  |
| EGFR     | 1.302 | 0.043 | 0.768 | 0.468 | 37.000 | 0.994 | 772.000  |
| SRC      | 1.491 | 0.013 | 0.671 | 0.618 | 27.000 | 0.991 | 288.000  |
| CDH5     | 1.717 | 0.003 | 0.582 | 0.714 | 15.000 | 0.986 | 74.000   |
| CDH3     | 1.774 | 0.002 | 0.564 | 0.782 | 13.000 | 0.985 | 34.000   |
| IQGAP1   | 1.736 | 0.003 | 0.576 | 0.724 | 15.000 | 0.986 | 58.000   |
| CDH2     | 1.453 | 0.024 | 0.688 | 0.522 | 29.000 | 0.991 | 442.000  |
| TCF7L1   | 1.679 | 0.004 | 0.596 | 0.669 | 17.000 | 0.987 | 98.000   |
| CTNND1   | 1.679 | 0.005 | 0.596 | 0.686 | 18.000 | 0.987 | 96.000   |
| SMAD4    | 1.377 | 0.030 | 0.726 | 0.581 | 33.000 | 0.993 | 680.000  |
| LEF1     | 1.415 | 0.024 | 0.707 | 0.555 | 31.000 | 0.992 | 438.000  |
| CDH1     | 1.321 | 0.042 | 0.757 | 0.479 | 36.000 | 0.994 | 716.000  |
| TCF7L2   | 1.434 | 0.028 | 0.697 | 0.494 | 30.000 | 0.992 | 472.000  |
| TCF7     | 1.623 | 0.007 | 0.616 | 0.632 | 20.000 | 0.988 | 148.000  |
| HDAC1    | 1.377 | 0.028 | 0.726 | 0.527 | 33.000 | 0.993 | 536.000  |
| CTNNA1   | 1.698 | 0.004 | 0.589 | 0.684 | 17.000 | 0.987 | 86.000   |
| CTNNBIP1 | 1.868 | 0.001 | 0.535 | 0.679 | 8.000  | 0.983 | 18.000   |
| DVL1     | 1.698 | 0.002 | 0.589 | 0.775 | 16.000 | 0.987 | 62.000   |
| BTRC     | 1.528 | 0.010 | 0.654 | 0.637 | 25.000 | 0.990 | 224.000  |
| AXIN2    | 1.604 | 0.006 | 0.624 | 0.690 | 21.000 | 0.988 | 142.000  |
| AXIN1    | 1.472 | 0.017 | 0.679 | 0.579 | 28.000 | 0.991 | 350.000  |
| GSK3B    | 1.396 | 0.022 | 0.716 | 0.550 | 32.000 | 0.992 | 464.000  |
| CTNNB1   | 1.019 | 0.161 | 0.981 | 0.363 | 52.000 | 1.000 | 1816.000 |
| AR       | 1.585 | 0.004 | 0.631 | 0.766 | 22.000 | 0.989 | 112.000  |
| CREBBP   | 1.415 | 0.019 | 0.707 | 0.578 | 31.000 | 0.992 | 408.000  |
| EP300    | 1.396 | 0.022 | 0.716 | 0.563 | 32.000 | 0.992 | 452.000  |
| ERBB2    | 1.509 | 0.017 | 0.663 | 0.566 | 26.000 | 0.990 | 310.000  |
| SP1      | 1.717 | 0.000 | 0.582 | 0.924 | 15.000 | 0.986 | 16.000   |
| SMAD3    | 1.415 | 0.026 | 0.707 | 0.591 | 31.000 | 0.992 | 588.000  |
| RUNX2    | 1.604 | 0.004 | 0.624 | 0.705 | 21.000 | 0.988 | 124.000  |
| E2F4     | 1.792 | 0.000 | 0.558 | 0.891 | 11.000 | 0.985 | 12.000   |
| TCF4     | 1.774 | 0.002 | 0.564 | 0.731 | 13.000 | 0.985 | 42.000   |
| FOXO3    | 1.642 | 0.002 | 0.609 | 0.842 | 19.000 | 0.988 | 54.000   |
| SMARCA4  | 1.604 | 0.008 | 0.624 | 0.662 | 21.000 | 0.988 | 154.000  |
| FOXO1    | 1.623 | 0.004 | 0.616 | 0.758 | 20.000 | 0.988 | 96.000   |
| SMURF2   | 1.792 | 0.003 | 0.558 | 0.764 | 11.000 | 0.985 | 94.000   |
| TGFBR1   | 1.717 | 0.008 | 0.582 | 0.629 | 15.000 | 0.986 | 216.000  |
| CDC73    | 1.849 | 0.000 | 0.541 | 0.889 | 9.000  | 0.984 | 8.000    |
| KLF4     | 1.604 | 0.004 | 0.624 | 0.738 | 21.000 | 0.988 | 114.000  |
| YWHAZ    | 1.736 | 0.005 | 0.576 | 0.538 | 14.000 | 0.986 | 92.000   |
| RUVBL1   | 1.811 | 0.003 | 0.552 | 0.673 | 11.000 | 0.984 | 36.000   |

|          |       |       |       |       |        |       |        |
|----------|-------|-------|-------|-------|--------|-------|--------|
| VCL      | 1.755 | 0.001 | 0.570 | 0.824 | 14.000 | 0.985 | 32.000 |
| SLC9A3R1 | 1.887 | 0.001 | 0.530 | 0.762 | 7.000  | 0.983 | 10.000 |
| EZR      | 1.792 | 0.001 | 0.558 | 0.818 | 12.000 | 0.985 | 24.000 |
| CTNNA3   | 1.811 | 0.002 | 0.552 | 0.745 | 11.000 | 0.984 | 28.000 |
| CTNNA2   | 1.792 | 0.003 | 0.558 | 0.667 | 12.000 | 0.985 | 44.000 |
| PSEN1    | 1.811 | 0.001 | 0.552 | 0.756 | 10.000 | 0.984 | 26.000 |
| SATB1    | 1.887 | 0.000 | 0.530 | 1.000 | 7.000  | 0.983 | 0.000  |
| PITX2    | 1.887 | 0.000 | 0.530 | 1.000 | 6.000  | 0.983 | 0.000  |
| ZFYVE9   | 2.226 | 0.000 | 0.449 | 1.000 | 4.000  | 0.976 | 0.000  |

Table S4. Immunohistochemical expression of cytoplasmic  $\beta$ -catenin proteins and their relationship with clinicopathological features of PDAC patients.

| Variables        | n (%)      | <b><math>\beta</math>-catenin<br/>cytoplasmic<br/>expression</b> |                | P value |
|------------------|------------|------------------------------------------------------------------|----------------|---------|
|                  |            | low<br>n = 49                                                    | high<br>n = 19 |         |
| Age<br>(years)   |            |                                                                  |                |         |
| ≤ 60             | 29 (42.65) | 23 (79.31)                                                       | 6 (20.69)      | 0.29    |
| > 60             | 39 (57.35) | 26 (66.67)                                                       | 13 (33.33)     |         |
| Gender           |            |                                                                  |                |         |
| Male             | 34 (50.00) | 23 (67.65)                                                       | 11 (32.35)     | 0.59    |
| Female           | 34 (50.00) | 26 (76.47)                                                       | 8 (23.53)      |         |
| Grading          |            |                                                                  |                |         |
| G1               | 5 (7.35)   | 3 (60.00)                                                        | 2 (40.00)      | 0.64    |
| G2               | 55 (80.88) | 41 (74.55)                                                       | 14 (25.45)     |         |
| G3               | 8 (11.77)  | 5 (62.50)                                                        | 3 (37.50)      |         |
| pT status        |            |                                                                  |                |         |
| T1-T2            | 53 (84.13) | 37 (69.81)                                                       | 16 (30.19)     | >0.99   |
| T3-T4            | 10 (15.87) | 7 (70.00)                                                        | 3 (30.00)      |         |
| pN status        |            |                                                                  |                |         |
| N0               | 30 (45.46) | 20 (66.67)                                                       | 10 (33.33)     | 0.41    |
| N1-N2            | 36 (54.54) | 28 (77.78)                                                       | 8 (22.22)      |         |
| TNM stage        |            |                                                                  |                |         |
| I                | 24 (38.71) | 15 (62.50)                                                       | 9 (37.50)      | 0.49    |
| II               | 24 (38.71) | 18 (75.00)                                                       | 6 (25.00)      |         |
| III-IV           | 14 (22.58) | 11 (78.57)                                                       | 3 (21.43)      |         |
| Location         |            |                                                                  |                |         |
| head             | 60 (88.24) | 44 (73.33)                                                       | 16 (26.67)     | 0.68    |
| body and<br>tail | 8(11.77)   | 5(62.5)                                                          | 3(37.5)        |         |
| PNI              |            |                                                                  |                |         |
| Absent           | 22 (34.38) | 16 (72.73)                                                       | 6 (27.27)      | >0.99   |
| Present          | 42 (65.62) | 30 (71.43)                                                       | 12 (28.57)     |         |

LVI

|         |            |            |            |      |
|---------|------------|------------|------------|------|
| Absent  | 39 (62.90) | 27 (69.23) | 12 (30.77) |      |
| Present | 23 (37.10) | 17 (73.91) | 6 (26.09)  | 0.78 |

Abbreviations: LVI—vascular invasion; PNI—perineural invasion

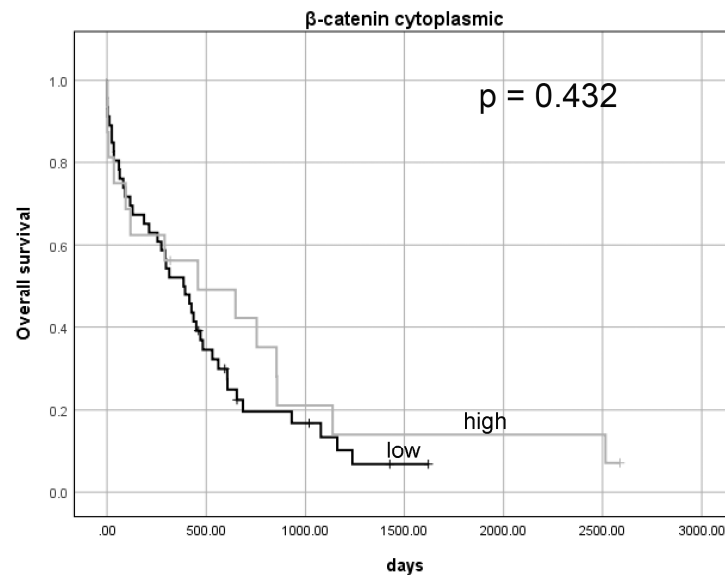

Figure S2. Kaplan-Meier curve for overall survival in patients pancreatic ductal adenocarcinomas by cytoplasmic  $\beta$ -catenin protein expression. P value was calculated using the log-rank test.

Table S5. Univariate analysis of prognostic factors by Cox proportional hazard model in own cohort for cytoplasmic  $\beta$ -catenin protein expression.

| Variable                      | Univariate analysis of own cohort |        |       |         |
|-------------------------------|-----------------------------------|--------|-------|---------|
|                               | HR                                | 95% CI |       | P value |
|                               |                                   | lower  | upper |         |
| $\beta$ -catenin <sup>c</sup> | 0.78                              | 0.41   | 1.46  | 0.434   |

Abbreviations: CI, confidence interval; HR, hazard ratio

Table S6. Multivariate analysis of prognostic factors by Cox proportional hazard model in own cohort for cytoplasmic  $\beta$ -catenin protein expression.

| Variable                      | Multivariate analysis of own cohort |        |       |              |
|-------------------------------|-------------------------------------|--------|-------|--------------|
|                               | HR                                  | 95% CI |       | P value      |
|                               |                                     | lower  | upper |              |
| $\beta$ -catenin <sup>c</sup> | 0.98                                | 0.49   | 1.97  | 0.95         |
| age                           | 1.04                                | 1.0    | 1.09  | <b>0.029</b> |
| TNM stage                     | 2.4                                 | 1.18   | 4.9   | <b>0.016</b> |
| LVI                           | 2.63                                | 1.36   | 1.36  | <b>0.004</b> |

Significant p-values ( $p < 0.05$ ) are marked in bold. Abbreviations: CI, confidence interval; HR, hazard ratio; LVI—vascular invasion. HR: adjusting for age, TNM stage, VI.
